# Supplementary material for: Imaging the antimicrobial mechanism(s) of cathelicidin-2
Source: PubMed Central journal article supplement (PMC5021996; doi:10.1038/srep32948), 2016-09-14
Supplement: srep32948-s1.pdf [file srep32948-s1.pdf]

**Supplementary Information:**

**Imaging the antimicrobial mechanism(s) of cathelicidin-2**

Viktoria A. F. Schneider<sup>1</sup>, Maarten Coorens<sup>1</sup>, Soledad R. Ordonez<sup>1</sup>, Johanna L. M.

Tjeerdsma-van Bokhoven<sup>1</sup>, George Posthuma<sup>2</sup>, Albert van Dijk<sup>1</sup>, Henk P. Haagsman<sup>1</sup>, Edwin

J. A. Veldhuizen<sup>1\*</sup>

<sup>1</sup>Department of Infectious Diseases and Immunology, Division Molecular Host Defence,  
Faculty of Veterinary Medicine, Utrecht University, Utrecht, The Netherlands

<sup>2</sup>Department of Cell Biology, Cell Microscopy Core, University Medical Centre Utrecht,  
Utrecht, The Netherlands

\*Corresponding author: [e.j.a.veldhuizen@uu.nl](mailto:e.j.a.veldhuizen@uu.nl)

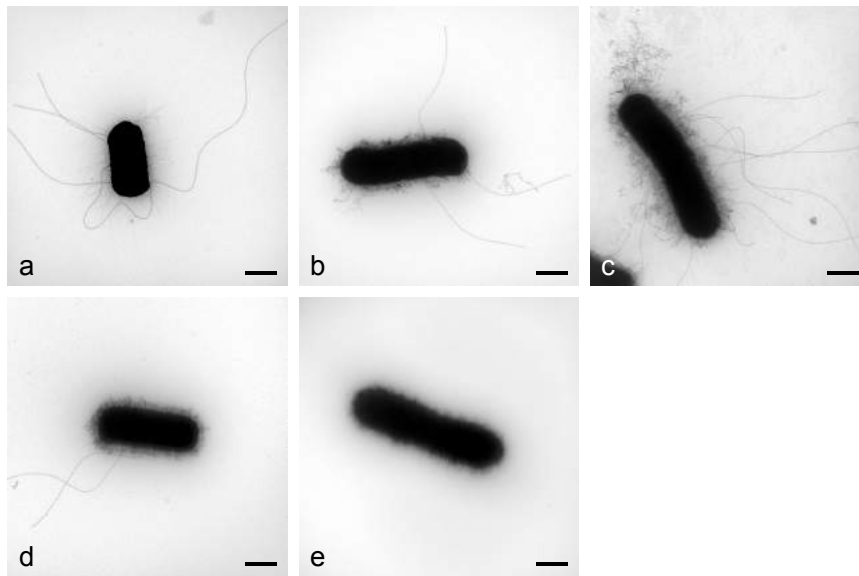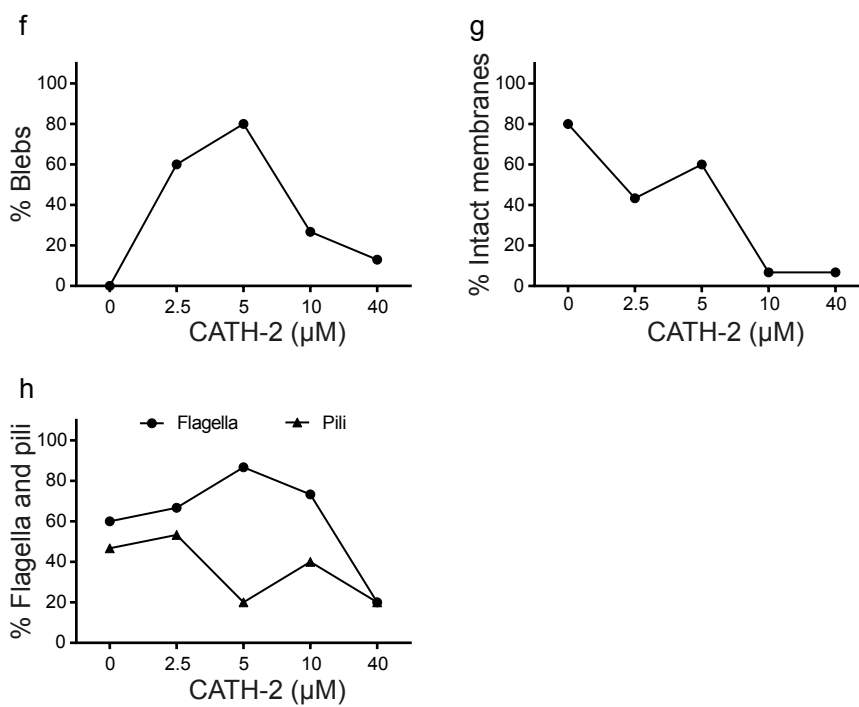

**Supplementary Figure S1.** CATH-2 induces bleb-formation and at higher concentrations membrane damage as visualized by negative-staining TEM. 0  $\mu\text{M}$  (a), 2.5  $\mu\text{M}$  (b), 5  $\mu\text{M}$  (c), 10  $\mu\text{M}$  (d) and 40  $\mu\text{M}$  (e) were incubated with *E. coli* cells for 30 min. Morphological changes were classified in bleb formation (f), membrane intactness (g) and amount of flagella and pili (h). Bars, 500 nm.

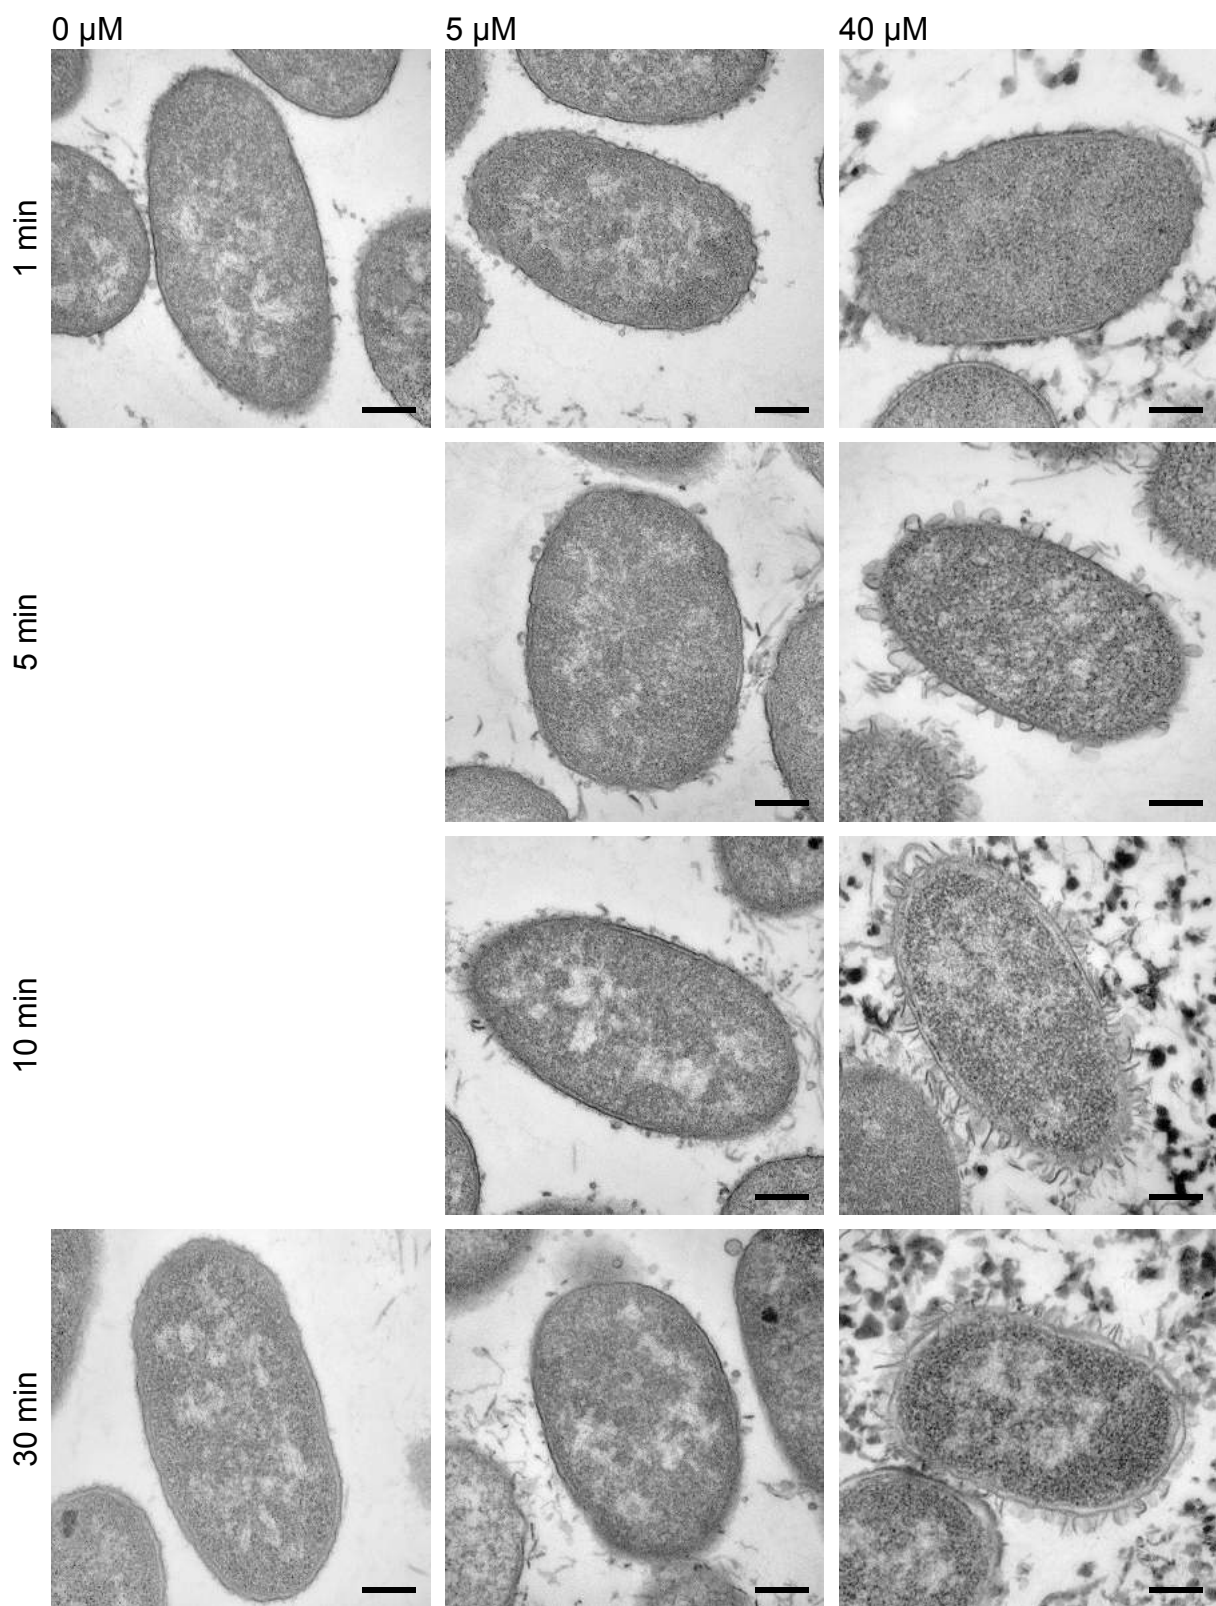

**Supplementary Figure S2.** CATH-2 causes time dependent morphological changes of *E. coli*. Bacteria were incubated with 5 and 40  $\mu\text{M}$  CATH-2 and reactions were stopped after 1, 5, 10 and 30 min. Representative TEM images are shown for 0  $\mu\text{M}$ , 5  $\mu\text{M}$  and 40  $\mu\text{M}$ . Bars, 200 nm.

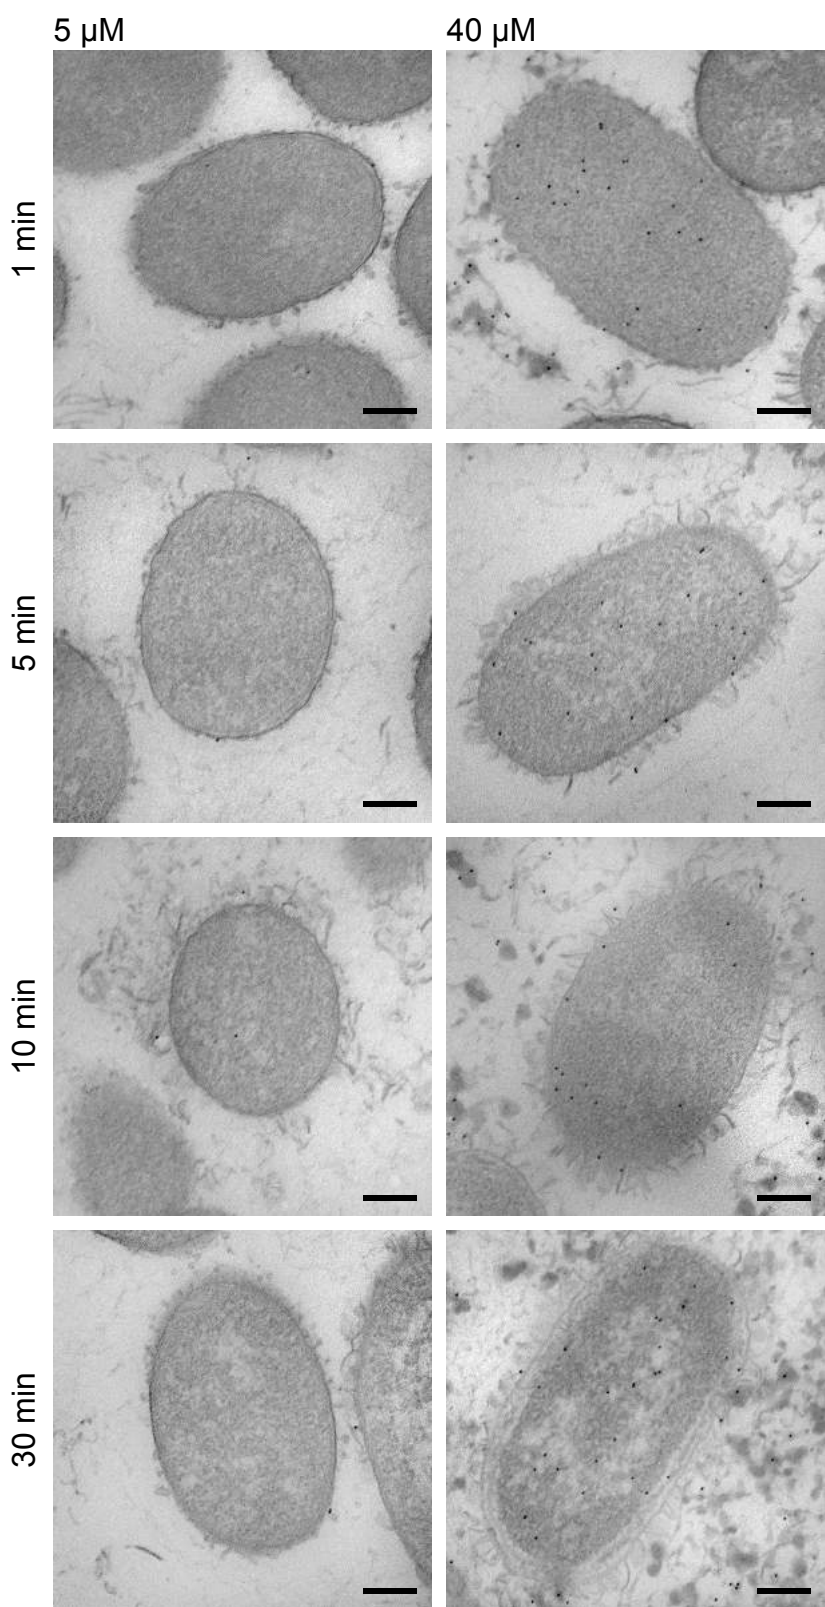

**Supplementary Figure S3.** Localization of CATH-2 on *E. coli* as a function of time. For each time point a representative TEM image is shown: panel 5  $\mu$ M and 40  $\mu$ M both after 1, 5, 10 and 30 min peptide exposure. Bars, 200 nm.

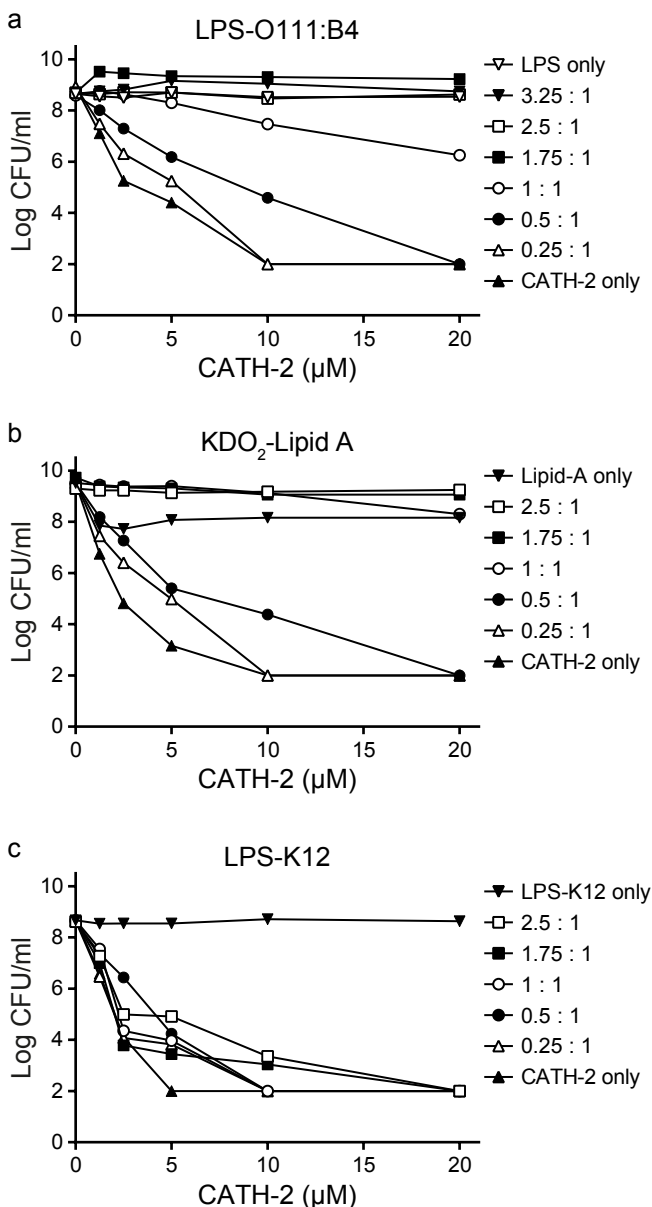

**Supplementary Figure S4.** LPS and Lipid A inhibit CATH-2 induced killing of *E. coli*. Different ratios of LPS-O111:B4 (a), KDO<sub>2</sub>-Lipid A (b) and LPS-K12 (c) were pre-incubated with CATH-2 for 1 h at 37 °C. Subsequently mixtures were exposed to *E. coli* for 3 h again at 37 °C and serially diluted and spread plated on TSA plates. Surviving colonies were counted after 16 h. One representative figure per compound is shown (n=3).

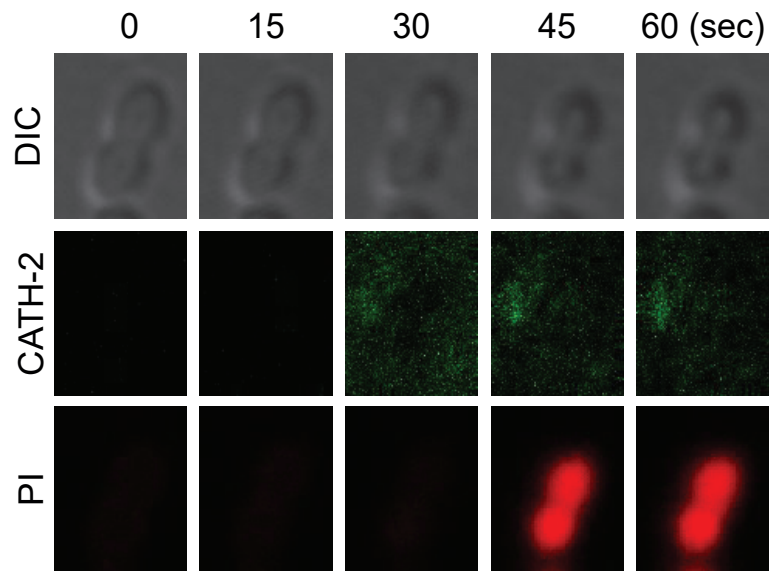

Supplementary Figure 5

Snapshots of *E. coli* K12 show lack CATH-2 binding to the membrane. Time-lapse imaging was performed with 1  $\mu\text{M}$  FITC-CATH-2 (green fluorescence) and 2.5  $\mu\text{M}$  PI (red fluorescence). One representative cell is shown. The first minute of a 6 minute movie is depicted.

## Supplementary movie legends

Supplementary Movie S1. CATH-2 binds and permeabilizes the bacterial membrane. Timelapse imaging was performed with 0.9  $\mu\text{M}$  FITC-CATH-2 and 5.1  $\mu\text{M}$  PI. DIC channel, FITC-labelled CATH-2 (green fluorescence), PI (red fluorescence) and custom (merged channels). One representative cell is shown. Bars, 1  $\mu\text{m}$ .

Supplementary Movie S2. CATH-2 permeabilizes multiple *E. coli* cells. Live-imaging with FITC-labelled CATH-2 (0.9  $\mu\text{M}$ ) and PI (5.1  $\mu\text{M}$ ). Bars, 2  $\mu\text{m}$ .
